# Supplementary material
Source: PubMed Central journal article supplement (PMC2663615)
Supplement: 2008.001347_1.pdf [file 2008.001347_1.pdf]

---

# Molecular allelokaryotyping of T-cell prolymphocytic leukemia cells with high density single nucleotide polymorphism arrays identifies novel common genomic lesions and acquired uniparental disomy

\*Daniel Nowak,<sup>1</sup> \*Emilie Le Toriellec,<sup>2,3</sup> Marc-Henri Stern,<sup>2,3</sup> Norihiko Kawamata,<sup>1</sup> Tadayuki Akagi,<sup>1</sup> Martin J. Dyer,<sup>4</sup> Wolf-Karsten Hofmann,<sup>5</sup> Seishi Ogawa,<sup>6,7,8</sup> and H. Phillip Koeffler<sup>1</sup>

<sup>1</sup>Division of Hematology and Oncology, Cedars Sinai Medical Center, UCLA School of Medicine, Los Angeles, USA; <sup>2</sup>Institut Curie, Centre de Recherche, Paris, France; <sup>3</sup>Inserm U830, Paris, France; <sup>4</sup>Department of Hematology, University Hospitals, Leicester, United Kingdom; <sup>5</sup>Department of Hematology and Oncology, Charité University Hospital, Campus Benjamin Franklin, Berlin, Germany; <sup>6</sup>Department of Hematology and Oncology and <sup>7</sup>Department of Cell Therapy and Transplantation Medicine and the 21<sup>st</sup> century COE program, Graduate School of Medicine, University of Tokyo, Japan, and <sup>8</sup>Core Research for Evolutional Science and Technology, Japan Science and Technology Agency, Japan

*Citation: Nowak D, Le Toriellec E, Stern M-H, Kawamata N, Akagi T, Dyer MJ, Hofmann W-K, Ogawa S and Koeffler HP. Molecular allelokaryotyping of T-cell prolymphocytic leukemia cells with high density single nucleotide polymorphism arrays identifies novel common genomic lesions and acquired uniparental disomy. Haematologica 2009; doi:10.3324/haematol.2008.001347*

[Online Supplementary Table S1.](#)

### Supplementary table 1

Listed are all copy number gains and losses as detected by molecular allelokaryotyping with 250K SNP arrays of our T-PLL samples. Alterations that arose due to miscalculations of signal background noise were excluded from this summary.

#### Deletions and amplifications chromosome 1

| Sample | Deletions           |              |                  | Amplifications      |              |             |
|--------|---------------------|--------------|------------------|---------------------|--------------|-------------|
|        | Start - End         | length (Mbp) | copy number (cn) | Start - End         | length (Mbp) | copy number |
| TP170  | 151880356-153088354 | 1.207998     | cn1              | 178292024-178520303 | 0.228279     | cn3         |
| TP172  |                     |              |                  | 164099958-164243756 | 0.143798     | cn3         |
| TP21   | 6146230-6344245     | 0.198015     | cn1              |                     |              |             |
| TP22   | 26860573-29239576   | 2.379003     | cn1              |                     |              |             |
|        | 67452671-99313693   | 31.861022    | cn1              |                     |              |             |
| TP25   | 25598247-25881984   | 0.283737     | cn1              |                     |              |             |
|        | 26102907-26624823   | 0.521916     | cn1              |                     |              |             |
| TP28   |                     |              |                  |                     |              |             |
| TP41   |                     |              |                  | 825852-120863833    | 120.037981   | cn4         |
|        |                     |              |                  | 141501392-142732360 | 1.230968     | cn3         |
|        |                     |              |                  | 180754716-183730500 | 2.975784     | cn4         |
|        |                     |              |                  | 198221297-245353397 | 47.1321      | cn4         |
| TP43   | 26102907-26936965   | 0.834058     | cn1              |                     |              |             |
| TP4    | 193462805-193618427 | 0.155622     | cn1              |                     |              |             |

#### Deletions and amplifications chromosome 2

| Sample | Deletions           |              |                  | Amplifications      |              |             |
|--------|---------------------|--------------|------------------|---------------------|--------------|-------------|
|        | Start - End         | length (Mbp) | copy number (cn) | Start - End         | length (Mbp) | copy number |
| TP172  | 24049-447320        | 0.423271     | cn1              |                     |              |             |
|        | 195454317-195579363 | 0.125046     | cn1              |                     |              |             |
| TP21   | 110234426-110337721 | 0.103295     | cn1              |                     |              |             |
| TP41   |                     |              |                  | 24049-40023030      | 39.998981    | cn4         |
|        |                     |              |                  | 40051950-242717659  | 202.665709   | cn4         |
| TP43   | 242636531-242717659 | 0.081128     | cn1              |                     |              |             |
| TP4    |                     |              |                  | 142021272-142072644 | 0.051372     | cn4         |
| TP57   |                     |              |                  | 33375717-33684292   | 0.308575     | cn4         |
| TP651  | 24377793-26213812   | 1.836019     | cn1              | 24049-272462        | 0.248413     | cn3         |
|        |                     |              |                  | 242080235-242717659 | 0.637424     | cn3         |
| TP799  | 105613160-106458348 | 0.845188     | cn1              |                     |              |             |

|                     |           |     |  |  |  |
|---------------------|-----------|-----|--|--|--|
| 112439085-121278033 | 8.838948  | cn1 |  |  |  |
| 121278825-142976150 | 21.697325 | cn1 |  |  |  |
| 143534925-144204005 | 0.66908   | cn1 |  |  |  |
| 144632926-145188943 | 0.556017  | cn1 |  |  |  |

### Deletions and amplifications chromosome 3

| Sample | Deletions           |              |                  | Amplifications      |              |             |
|--------|---------------------|--------------|------------------|---------------------|--------------|-------------|
|        | Start - End         | length (Mbp) | copy number (cn) | Start - End         | length (Mbp) | copy number |
| TP170  |                     |              |                  | 48789-34322934      | 34.274145    | cn3         |
|        |                     |              |                  | 147267329-199322068 | 52.054739    | cn3         |
| TP22   | 100337759-102554948 | 2.217189     | cn1              |                     |              |             |
|        | 102932423-123522752 | 20.590329    | cn1              |                     |              |             |
|        |                     |              |                  | 123533313-175903303 | 52.36999     | cn3         |
|        |                     |              |                  | 176271514-199322068 | 23.050554    | cn3         |
| TP25   | 130253524-130567162 | 0.313638     | cn1              |                     |              |             |
|        | 174710570-174895431 | 0.184861     | cn1              |                     |              |             |
| TP28   | 8344647-8455539     | 0.110892     | cn1              |                     |              |             |
| TP35   | 70753740-73056471   | 2.302731     | cn1              |                     |              |             |
| TP41   |                     |              |                  | 48603-71295488      | 71.246885    | cn4         |
|        |                     |              |                  | 71618028-199322068  | 127.70404    | cn4         |
| TP43   | 96242194-97149282   | 0.907088     | cn1              |                     |              |             |
|        | 98831000-99948725   | 1.117725     | cn1              |                     |              |             |
|        | 105513929-105863046 | 0.349117     | cn1              |                     |              |             |
|        | 106353367-106779439 | 0.426072     | cn1              |                     |              |             |
|        | 107670401-131708222 | 24.037821    | cn1              |                     |              |             |
|        | 148919712-149671328 | 0.751616     | cn1              |                     |              |             |
|        | 177688928-178009038 | 0.32011      | cn1              |                     |              |             |
|        | 179147623-180187651 | 1.040028     | cn1              |                     |              |             |
|        | 191952354-192881668 | 0.929314     | cn1              |                     |              |             |
|        | 193376800-193661874 | 0.285074     | cn1              |                     |              |             |
| TP4    | 643003-5447844      | 4.804841     | cn1              |                     |              |             |
|        | 69336322-71235387   | 1.899065     | cn1              |                     |              |             |
|        | 71276619-71682261   | 0.405642     | cn0              |                     |              |             |
|        | 71705139-95301818   | 23.596679    | cn1              |                     |              |             |
|        | 99439608-101168681  | 1.729073     | cn1              |                     |              |             |
|        | 107745112-109453711 | 1.708599     | cn1              |                     |              |             |
|        | 111311305-112342878 | 1.031573     | cn1              |                     |              |             |
| TP57   |                     |              |                  | 48603-22699154      | 22.650551    | cn3         |
| TP651  |                     |              |                  | 48789-396794        | 0.348005     | cn3         |
| TP799  | 4461303-9602027     | 5.140724     | cn1              | 48603-4446500       | 4.397897     | cn3         |

|  |                     |           |     |                     |           |     |
|--|---------------------|-----------|-----|---------------------|-----------|-----|
|  | 52693320-54778198   | 2.084878  | cn1 | 9603375-48299470    | 38.696095 | cn3 |
|  |                     |           |     | 54789616-60014051   | 5.224435  | cn3 |
|  | 69087530-121098065  | 52.010535 | cn1 | 65782031-67379307   | 1.597276  | cn3 |
|  | 150638016-152615878 | 1.977862  | cn1 |                     |           |     |
|  | 174195592-177204933 | 3.009341  | cn1 | 152623952-174172004 | 21.548052 | cn3 |
|  |                     |           |     |                     |           |     |

#### Deletions and amplifications chromosome 4

| Sample | Deletions           |              |                  | Amplifications      |              |             |
|--------|---------------------|--------------|------------------|---------------------|--------------|-------------|
|        | Start - End         | length (Mbp) | copy number (cn) | Start - End         | length (Mbp) | copy number |
| TP21   | 19099-31303405      | 31.284306    | cn1              | 86788264-114865533  | 28.077269    | cn3         |
|        |                     |              |                  | 114869128-118137034 | 3.267906     | cn4         |
|        | 118148184-118165085 | 0.016901     | cn1              | 118189563-124986420 | 6.796857     | cn4         |
|        |                     |              |                  | 125016804-149134058 | 24.117254    | cn4         |
|        |                     |              |                  | 149176182-153146998 | 3.970816     | cn4         |
|        | 153147391-153152305 | 0.004914     | cn1              | 153163048-190802659 | 37.639611    | cn4         |
| TP25   | 19099-38652398      | 38.633299    | cn1              | 190866530-191306043 | 0.439513     | cn4         |
|        | 152960769-153984935 | 1.024166     | cn1              | 44816466-44846780   | 0.030314     | cn4         |
| TP34   | 4408051-9758425     | 5.350374     | cn1              | 19099-4394990       | 4.375891     | cn3         |
|        | 14580003-17705369   | 3.125366     | cn1              | 9791390-14566579    | 4.775189     | cn3         |
|        | 18057581-20684540   | 2.626959     | cn1              | 17725458-18043522   | 0.318064     | cn3         |
|        | 21044608-34539160   | 13.494552    | cn1              | 20718244-21027774   | 0.30953      | cn3         |
|        | 64972798-65767008   | 0.79421      | cn1              | 34577405-64962104   | 30.384699    | cn3         |
|        | 66002370-68210200   | 2.20783      | cn1              | 65769972-65988941   | 0.218969     | cn4         |
|        | 68227529-68610480   | 0.382951     | cn1              | 68221763-68221956   | 0.000193     | cn5         |
|        |                     |              |                  | 68619630-70391165   | 1.771535     | cn3         |
|        |                     |              |                  |                     |              |             |
|        |                     |              |                  |                     |              |             |

|      |                     |           |     |                     |            |     |
|------|---------------------|-----------|-----|---------------------|------------|-----|
|      | 70467088-70683146   | 0.216058  | cn1 |                     |            |     |
|      | 73129101-100030402  | 26.901301 | cn1 | 70687588-73112243   | 2.424655   | cn3 |
|      | 100764200-101672469 | 0.908269  | cn1 | 100045806-100116310 | 0.070504   | cn5 |
|      | 104285651-121561197 | 17.275546 | cn1 | 100140847-100711435 | 0.570588   | cn3 |
|      |                     |           |     | 101675443-104207362 | 2.531919   | cn3 |
| TP41 |                     |           |     | 19099-191306043     | 191.286944 | cn4 |

### Deletions and amplifications chromosome 5

| Sample | Deletions           |              |                  | Amplifications    |              |             |
|--------|---------------------|--------------|------------------|-------------------|--------------|-------------|
|        | Start - End         | length (Mbp) | copy number (cn) | Start - End       | length (Mbp) | copy number |
| TP170  |                     |              |                  | 159819-1776063    | 1.616244     | cn4         |
|        |                     |              |                  | 1845474-3234008   | 1.388534     | cn5         |
|        |                     |              |                  | 3245848-3573064   | 0.327216     | cn4         |
|        |                     |              |                  | 3578440-4091271   | 0.512831     | cn5         |
|        |                     |              |                  | 4116207-12293655  | 8.177448     | cn3         |
|        |                     |              |                  | 12307834-12470170 | 0.162336     | cn4         |
|        |                     |              |                  | 12513751-29785240 | 17.271489    | cn3         |
|        |                     |              |                  | 29806886-31559354 | 1.752468     | cn4         |
|        |                     |              |                  | 31588652-32776979 | 1.188327     | cn3         |
|        |                     |              |                  | 32802579-35452164 | 2.649585     | cn4         |
| TP172  |                     |              |                  | 35454541-37542089 | 2.087548     | cn3         |
|        |                     |              |                  | 37589795-43028194 | 5.438399     | cn4         |
|        |                     |              |                  | 81949-13886223    | 13.804274    | cn3         |
|        |                     |              |                  | 13901225-14233433 | 0.332208     | cn4         |
| TP21   | 42780652-43146612   | 0.36596      | cn1              | 14240151-42342138 | 28.101987    | cn3         |
| TP22   | 80114337-80426046   | 0.311709     | cn1              | 79516376-79626563 | 0.110187     | cn3         |
|        | 84614006-96146211   | 11.532205    | cn1              |                   |              |             |
|        | 100448684-128502641 | 28.053957    | cn1              |                   |              |             |
|        | 150654041-155624614 | 4.970573     | cn1              |                   |              |             |
|        | 156183173-156450666 | 0.267493     | cn1              |                   |              |             |
|        | 158298841-167623786 | 9.324945     | cn1              |                   |              |             |
| TP28   | 872671-874726       | 0.002055     | cn1              | 81949-814748      | 0.732799     | cn4         |
|        |                     |              |                  | 876820-1602135    | 0.725315     | cn4         |
|        |                     |              |                  | 1621463-2111183   | 0.48972      | cn5         |
|        |                     |              |                  | 2144502-2196119   | 0.051617     | cn4         |

|      |                                                                |                                    |                   |                                                                                                                                             |                                                                                   |                                               |
|------|----------------------------------------------------------------|------------------------------------|-------------------|---------------------------------------------------------------------------------------------------------------------------------------------|-----------------------------------------------------------------------------------|-----------------------------------------------|
|      |                                                                |                                    |                   | 2203273-13558432                                                                                                                            | 11.355159                                                                         | cn3                                           |
| TP34 | 49596616-96791184<br>98038132-115575493<br>116226943-116352837 | 47.194568<br>17.537361<br>0.125894 | cn1<br>cn1<br>cn1 |                                                                                                                                             |                                                                                   |                                               |
| TP37 | 84284722-119363277                                             | 35.078555                          | cn1               |                                                                                                                                             |                                                                                   |                                               |
| TP41 |                                                                |                                    |                   | 81949-180629495                                                                                                                             | 180.547546                                                                        | cn4                                           |
| TP4  |                                                                |                                    |                   | 159819-38270360<br>38307553-46419092                                                                                                        | 38.110541<br>8.111539                                                             | cn4<br>cn3                                    |
| TP56 |                                                                |                                    |                   | 159819-1871630<br>1883374-11945478<br>11959312-12409732<br>12434864-12630738<br>12642411-13643526<br>13695773-35900347<br>35905575-42785934 | 1.711811<br>10.062104<br>0.45042<br>0.195874<br>1.001115<br>22.204574<br>6.880359 | cn5<br>cn4<br>cn3<br>cn4<br>cn3<br>cn4<br>cn4 |
| TP57 |                                                                |                                    |                   | 81949-26039041                                                                                                                              | 25.957092                                                                         | cn4                                           |
|      |                                                                |                                    |                   |                                                                                                                                             |                                                                                   |                                               |

#### Deletions and amplifications chromosome 6

| Sample | Deletions                              |                       |                  | Amplifications                                                                               |                                           |                                 |
|--------|----------------------------------------|-----------------------|------------------|----------------------------------------------------------------------------------------------|-------------------------------------------|---------------------------------|
|        | Start - End                            | length (Mbp)          | copy number (cn) | Start - End                                                                                  | length (Mbp)                              | copy number                     |
| TP166  |                                        |                       |                  | 119769-374457                                                                                | 0.255                                     | cn3                             |
| TP168  | 147912199-170792391                    | 22.880192             | cn1              |                                                                                              |                                           |                                 |
| TP170  | 95556287-95616345                      | 0.060058              | cn1              |                                                                                              |                                           |                                 |
| TP172  | 65754214-170792391                     | 105.038177            | cn1              |                                                                                              |                                           |                                 |
| TP28   |                                        |                       |                  | 119769-197772<br>340634-36381295                                                             | 0.078<br>36.041                           | cn3<br>cn3                      |
| TP34   | 45279340-57358347<br>62030184-63421826 | 12.079007<br>1.391642 | cn1<br>cn1       | 14062611-15256340<br>22993293-35277686<br>37529775-43660075                                  | 1.194<br>12.284<br>6.13                   | cn3<br>cn3<br>cn3               |
| TP35   | 67068322-67105350                      | 0.037028              | cn0 real         |                                                                                              |                                           |                                 |
| TP37   | 1450510-4809580<br>85002218-170792391  | 3.35907<br>85.790173  | cn1<br>cn1       |                                                                                              |                                           |                                 |
| TP41   |                                        |                       |                  | 119769-170792391                                                                             | 170.673                                   | cn4                             |
| TP57   |                                        |                       |                  | 119769-983795<br>1001155-4623259<br>4645683-6910767<br>6923860-11379978<br>11384014-14122676 | 0.864<br>3.622<br>2.265<br>4.456<br>2.739 | cn3<br>cn3<br>cn3<br>cn3<br>cn3 |

|       |                     |           |     |                   |        |     |
|-------|---------------------|-----------|-----|-------------------|--------|-----|
|       |                     |           |     | 14154469-24219596 | 10.065 | cn3 |
|       |                     |           |     | 24241199-42328329 | 18.087 | cn3 |
|       | 139462378-170792391 | 31.330013 | cn1 |                   |        |     |
| TP651 |                     |           |     | 131221-614506     | 0.483  | cn3 |
| TP799 | 111629316-112090001 | 0.460685  | cn1 |                   |        |     |

### Deletions and amplifications chromosome 7

| Sample              | Deletions           |              |                     | Amplifications      |              |             |
|---------------------|---------------------|--------------|---------------------|---------------------|--------------|-------------|
|                     | Start - End         | length (Mbp) | copy number (cn)    | Start - End         | length (Mbp) | copy number |
| TP166               | 117232490-118939993 | 1.708        | cn1                 |                     |              |             |
|                     | 121054665-128252690 | 7.198        | cn1                 |                     |              |             |
|                     | 141852546-141998293 | 0.146        | cn1                 |                     |              |             |
|                     | 142333764-158605053 | 16.271       | cn1                 |                     |              |             |
| TP170               | 4719467-5166295     | 0.447        | cn1                 |                     |              |             |
|                     | 74842427-75119948   | 0.278        | cn1                 |                     |              |             |
|                     | 77281244-79352038   | 2.071        | cn1                 |                     |              |             |
|                     | 141531118-141998293 | 0.467        | cn1                 |                     |              |             |
| TP172               | 38092579-38144574   | 0.052        | cn0                 |                     |              |             |
| TP21                |                     |              |                     | 66276576-71528398   | 5.251822     | cn3         |
|                     | 141734811-141998293 | 0.263        | cn1                 |                     |              |             |
| TP22                | 141322-38076360     | 37.935       | cn1                 |                     |              |             |
|                     | 38092579-38178211   | 0.086        | cn0                 |                     |              |             |
|                     | 38190796-57730637   | 19.54        | cn1                 |                     |              |             |
|                     | 78501355-83238456   | 4.737        | cn1                 |                     |              |             |
|                     | 105649171-127990633 | 22.341       | cn1                 |                     |              |             |
|                     | 143513397-148008729 | 4.495        | cn1                 |                     |              |             |
|                     | 148027517-148157304 | 0.13         | cn0                 |                     |              |             |
|                     | 148666727-150016115 | 1.349        | cn1                 |                     |              |             |
|                     | 150022828-150357477 | 0.335        | cn0                 |                     |              |             |
| 150395694-158605053 | 8.209               | cn1          |                     |                     |              |             |
| TP25                | 38084338-38125215   | 0.041        | cn0                 |                     |              |             |
|                     | 141455427-142018646 | 0.563        | cn1                 | 157374819-157590205 | 0.215386     | cn3         |
| TP28                | 38092579-38144574   | 0.052        | cn0                 |                     |              |             |
| TP34                | 38092579-38125215   | 0.033        | cn0                 |                     |              |             |
|                     |                     |              |                     | 57299193-57466015   | 0.166822     | cn3         |
|                     |                     |              |                     | 69850658-99859138   | 30.00848     | cn3         |
|                     |                     |              | 100525765-141752861 | 41.227096           | cn3          |             |
| TP35                | 38067354-38105534   | 0.038        | cn0                 |                     |              |             |
|                     | 141751255-141998293 | 0.247        | cn1                 |                     |              |             |
| TP37                | 38067354-38125215   | 0.058        | cn0                 |                     |              |             |

|       |                     |        |     |                     |            |     |
|-------|---------------------|--------|-----|---------------------|------------|-----|
|       | 141495143-141998293 | 0.503  | cn1 |                     |            |     |
| TP41  | 38084338-38160031   | 0.076  | cn1 | 141322-38076360     | 37.935038  | cn4 |
|       | 141633482-141998293 | 0.365  | cn1 | 38178211-141514700  | 103.336489 | cn4 |
|       |                     |        |     | 142018646-158605053 | 16.586407  | cn4 |
|       |                     |        |     |                     |            |     |
| TP43  | 38076360-38125215   | 0.049  | cn0 |                     |            |     |
|       | 141495143-141998293 | 0.503  | cn1 |                     |            |     |
| TP4   | 38067354-38105534   | 0.038  | cn0 |                     |            |     |
|       | 141582221-141842222 | 0.26   | cn1 |                     |            |     |
|       | 141852546-141998293 | 0.146  | cn0 |                     |            |     |
| TP56  | 141322-5542730      | 5.401  | cn1 |                     |            |     |
|       | 5952172-25017216    | 19.065 | cn1 |                     |            |     |
|       | 29289890-57730637   | 28.441 | cn1 |                     |            |     |
|       | 107227468-108327230 | 1.1    | cn1 | 61547528-107220721  | 45.673193  | cn3 |
|       | 108898621-121520062 | 12.621 | cn1 | 108350759-108894515 | 0.543756   | cn3 |
|       | 141582221-141998293 | 0.416  | cn1 |                     |            |     |
| TP57  | 38084338-38178211   | 0.094  | cn0 |                     |            |     |
|       | 141495143-141998293 | 0.503  | cn1 |                     |            |     |
| TP651 | 141668799-141960914 | 0.292  | cn1 |                     |            |     |
|       |                     |        |     | 157835950-158497633 | 0.661683   | cn3 |
|       |                     |        |     | 158529021-158605053 | 0.076032   | cn4 |
| TP799 | 38067354-38093014   | 0.026  | cn1 |                     |            |     |
|       | 141497234-141998293 | 0.501  | cn1 |                     |            |     |

### Deletions and amplifications chromosome 8

| Sample | Deletions         |              |                    | Amplifications    |              |             |
|--------|-------------------|--------------|--------------------|-------------------|--------------|-------------|
|        | Start - End       | length (Mbp) | copy number (cn)   | Start - End       | length (Mbp) | copy number |
| TP166  | 180568-30005683   | 29.825       | cn1                |                   |              |             |
|        |                   |              |                    | 30013376-30525448 | 0.512        | cn4         |
|        | 30556394-37670512 | 7.114        | cn1                |                   |              |             |
|        |                   |              |                    | 37709604-38566506 | 0.857        | cn4         |
|        |                   |              |                    | 38648427-40616135 | 1.968        | cn3         |
|        |                   |              |                    | 40648225-42902832 | 2.255        | cn4         |
|        |                   |              |                    | 43071141-50259861 | 7.189        | cn3         |
|        | 50267811-50571433 | 0.304        | cn1                |                   |              |             |
|        |                   |              |                    | 50608009-52932316 | 2.324        | cn3         |
|        |                   |              |                    | 53715730-97139849 | 43.424       | cn3         |
|        |                   |              | 99170315-102690095 | 3.52              | cn3          |             |



|       |                                                           |                           |                   |                     |        |     |
|-------|-----------------------------------------------------------|---------------------------|-------------------|---------------------|--------|-----|
|       |                                                           |                           |                   | 104148224-123842015 | 19.694 | cn3 |
|       |                                                           |                           |                   | 125332999-133932169 | 8.599  | cn3 |
|       |                                                           |                           |                   | 134987201-146263538 | 11.276 | cn3 |
| TP168 | 2042502-4914636<br>4976549-36631926                       | 2.872<br>31.655           | cn1<br>cn1        |                     |        |     |
|       |                                                           |                           |                   | 36638511-41863251   | 5.225  | cn4 |
|       |                                                           |                           |                   | 41870456-61366755   | 19.496 | cn4 |
|       |                                                           |                           |                   | 61395962-119792244  | 58.396 | cn4 |
|       |                                                           |                           |                   | 119793078-119806603 | 0.014  | cn4 |
|       |                                                           |                           |                   | 119809712-137747078 | 17.937 | cn4 |
|       | 137757137-137955330                                       | 0.198                     | cn1               |                     |        |     |
|       |                                                           |                           |                   | 137976833-146263538 | 8.287  | cn4 |
| TP170 | 180568-30556573                                           | 30.376                    | cn1               |                     |        |     |
|       |                                                           |                           |                   | 30567360-97291094   | 66.724 | cn3 |
|       |                                                           |                           |                   | 97318889-146263538  | 48.945 | cn3 |
| TP172 | 180568-20116050<br>20169287-25055251<br>25104790-37280959 | 19.935<br>4.886<br>12.176 | cn1<br>cn1<br>cn1 |                     |        |     |
|       |                                                           |                           |                   | 37281338-41353607   | 4.072  | cn4 |
|       |                                                           |                           |                   | 41377406-42269519   | 0.892  | cn5 |
|       |                                                           |                           |                   | 42277059-49376463   | 7.099  | cn4 |
|       |                                                           |                           |                   | 49384285-49385062   | 0.001  | cn4 |
|       |                                                           |                           |                   | 49434882-52424024   | 2.989  | cn4 |
|       | 52449065-55475848                                         | 3.027                     | cn1               |                     |        |     |
|       |                                                           |                           |                   | 55486603-79975099   | 24.488 | cn4 |
|       |                                                           |                           |                   | 79977663-119646159  | 39.668 | cn4 |
|       | 119658006-120496451                                       | 0.838                     | cn1               |                     |        |     |
|       |                                                           |                           |                   | 120498925-146263538 | 25.765 | cn4 |
| TP21  | 180568-32725125                                           | 32.545                    | cn1               |                     |        |     |
|       |                                                           |                           |                   | 32748740-32881490   | 0.133  | cn4 |
|       |                                                           |                           |                   | 32897185-33042060   | 0.145  | cn5 |
|       |                                                           |                           |                   | 33071944-36476517   | 3.405  | cn3 |
|       | 36497008-36675679                                         | 0.179                     | cn1               |                     |        |     |
|       |                                                           |                           |                   | 36684863-38923786   | 2.239  | cn4 |
|       | 38940822-40094160                                         | 1.153                     | cn1               |                     |        |     |
|       |                                                           |                           |                   | 40123888-116672278  | 76.548 | cn3 |
|       | 116694882-117365162                                       | 0.67                      | cn1               |                     |        |     |
|       |                                                           |                           |                   | 117386160-146263538 | 28.877 | cn3 |
| TP25  | 18187886-18309434<br>90873782-91022515                    | 0.122<br>0.149            | cn1<br>cn1        |                     |        |     |
| TP28  | 180568-42596495                                           | 42.416                    | cn1               |                     |        |     |
|       |                                                           |                           |                   | 42604697-43618302   |        | cn3 |
|       | 43723519-43820269                                         | 0.097                     | cn1               |                     |        |     |

|      |                   |        |          |                     |  |     |
|------|-------------------|--------|----------|---------------------|--|-----|
|      |                   |        |          | 47043376-146263538  |  | cn3 |
| TP34 | 5063717-5268226   | 0.205  | cn1      |                     |  |     |
|      | 9122765-29608631  | 20.486 | cn1      |                     |  |     |
|      |                   |        |          | 34129345-34446325   |  | cn3 |
|      | 34658541-34784029 | 0.125  | cn1      |                     |  |     |
|      | 35400272-37835460 | 2.435  | cn1      |                     |  |     |
|      | 38800233-38901784 | 0.102  | cn1      |                     |  |     |
|      | 38923786-38959748 | 0.036  | cn0      |                     |  |     |
|      | 39003333-39423310 | 0.42   | cn1      |                     |  |     |
|      | 39523051-39870727 | 0.348  | cn0 real |                     |  |     |
|      | 39877975-39992705 | 0.115  | cn1      |                     |  |     |
|      | 40000344-40068118 | 0.068  | cn0      |                     |  |     |
|      | 40074409-40140063 | 0.066  | cn1      |                     |  |     |
|      | 42004277-42222479 | 0.218  | cn1      |                     |  |     |
|      |                   |        |          | 47535393-48723259   |  | cn3 |
|      | 48854459-49037364 | 0.183  | cn1      |                     |  |     |
|      |                   |        |          | 51723458-52192291   |  | cn3 |
|      |                   |        |          | 52584231-53504175   |  | cn3 |
|      |                   |        |          | 53598684-53928945   |  | cn3 |
|      | 55225990-55560721 | 0.335  | cn1      |                     |  |     |
|      | 56071201-56339119 | 0.268  | cn1      |                     |  |     |
|      | 60509380-61486646 | 0.977  | cn1      |                     |  |     |
|      | 62513049-65355691 | 2.843  | cn1      |                     |  |     |
|      |                   |        |          | 65632682-75230666   |  | cn3 |
|      |                   |        |          | 76461693-86722738   |  | cn3 |
|      |                   |        |          | 88627691-89380901   |  | cn3 |
|      |                   |        |          | 89677806-90138549   |  | cn3 |
|      |                   |        |          | 90606777-90751405   |  | cn3 |
|      |                   |        |          | 91018273-105361774  |  | cn3 |
|      |                   |        |          | 105378279-114118249 |  | cn4 |
|      |                   |        |          | 114142324-115330310 |  | cn3 |
|      |                   |        |          | 115335235-119231130 |  | cn4 |
|      |                   |        |          | 119235165-121449563 |  | cn3 |
|      |                   |        |          | 121485532-146263538 |  | cn4 |
| TP35 |                   |        |          | 180568-146263538    |  | cn3 |
| TP37 | 180568-36969176   | 36.789 | cn1      |                     |  |     |
| TP41 |                   |        |          | 36156815-146263538  |  | cn4 |
| TP4  |                   |        |          | 35098187-43820269   |  | cn3 |
|      |                   |        |          | 47043376-79798419   |  | cn4 |
|      |                   |        |          | 79816700-114005299  |  | cn4 |
|      |                   |        |          | 114031134-115771855 |  | cn5 |
|      |                   |        |          | 115827888-146263538 |  | cn4 |
| TP56 |                   |        |          | 180568-12040126     |  | cn3 |

|       |                                      |                  |            |                                                                |  |                   |
|-------|--------------------------------------|------------------|------------|----------------------------------------------------------------|--|-------------------|
|       |                                      |                  |            | 12286403-146263538                                             |  | cn3               |
| TP57  | 180568-11941938<br>12447312-37299193 | 11.761<br>24.852 | cn1<br>cn1 | 37328458-49037364<br>49184635-115771855<br>115827888-146263538 |  | cn5<br>cn4<br>cn5 |
| TP651 |                                      |                  |            | 180568-320846<br>101561068-146263538                           |  | cn3<br>cn3        |

### Deletions and amplifications chromosome 9

| Sample | Deletions                                                                                                                                                            |                                                                                               |                                                      | Amplifications  |              |             |
|--------|----------------------------------------------------------------------------------------------------------------------------------------------------------------------|-----------------------------------------------------------------------------------------------|------------------------------------------------------|-----------------|--------------|-------------|
|        | Start - End                                                                                                                                                          | length (Mbp)                                                                                  | copy number (cn)                                     | Start - End     | length (Mbp) | copy number |
| TP34   | 30910-42937560<br>42937610-43863873<br>44108554-67354917<br>70912141-71382638<br>79300907-102022250<br>102041415-102711737<br>102762953-138303776                    | 42.90665<br>0.926263<br>23.246363<br>0.470497<br>22.721343<br>0.670322<br>35.540823           | cn1<br>cn0<br>cn1<br>cn1<br>cn1<br>cn0<br>cn1        |                 |              |             |
| TP37   | 24504390-24505111                                                                                                                                                    | 0.000721                                                                                      | cn0                                                  |                 |              |             |
| TP41   |                                                                                                                                                                      |                                                                                               |                                                      | 30910-138303776 | 138.272866   | cn4         |
| TP4    | 30910-11831788<br>12225978-13227999<br>13820851-16208659<br>16648915-19021758<br>22231296-26259317<br>26462639-31389459<br>78314465-103812699<br>116018252-117309109 | 11.800878<br>1.002021<br>2.387808<br>2.372843<br>4.028021<br>4.92682<br>25.498234<br>1.290857 | cn1<br>cn1<br>cn1<br>cn1<br>cn1<br>cn1<br>cn1<br>cn1 |                 |              |             |
| TP799  | 4390070-5049440<br>127280351-130106194                                                                                                                               | 0.65937<br>2.825843                                                                           | cn1<br>cn1                                           |                 |              |             |

### Deletions and amplifications chromosome 10

| Sample | Deletions                                                                     |                                               |                          | Amplifications |              |             |
|--------|-------------------------------------------------------------------------------|-----------------------------------------------|--------------------------|----------------|--------------|-------------|
|        | Start - End                                                                   | length (Mbp)                                  | copy number (cn)         | Start - End    | length (Mbp) | copy number |
| TP170  | 148946-5692243<br>17718148-22325377<br>23032969-39064552<br>54778135-56318960 | 5.543297<br>4.607229<br>16.031583<br>1.540825 | cn1<br>cn1<br>cn1<br>cn1 |                |              |             |

|      |                     |          |     |                     |           |     |
|------|---------------------|----------|-----|---------------------|-----------|-----|
| TP35 |                     |          |     | 46363383-47154881   | 0.791498  | cn3 |
| TP41 |                     |          |     | 148946-135311386    | 135.16244 | cn4 |
| TP4  |                     |          |     | 135165535-135311386 | 0.145851  | cn4 |
| TP56 | 108954534-111745117 | 2.790583 | cn1 |                     |           |     |
|      |                     |          |     | 111824569-135311386 | 23.486817 | cn3 |
| TP57 | 85720790-86922140   | 1.20135  | cn1 |                     |           |     |
|      | 90488702-94393578   | 3.904876 | cn1 |                     |           |     |
|      | 133604797-135311386 | 1.706589 | cn1 |                     |           |     |

### Deletions and amplifications chromosome 11

| Sample | Deletions           |              |                  | Amplifications   |              |             |
|--------|---------------------|--------------|------------------|------------------|--------------|-------------|
|        | Start - End         | length (Mbp) | copy number (cn) | Start - End      | length (Mbp) | copy number |
| TP166  | 106417979-114849006 | 8.431        | cn1              |                  |              |             |
| TP168  | 83165537-114272263  | 31.107       | cn1              |                  |              |             |
| TP172  | 51061717-60709290   | 9.648        | cn1              |                  |              |             |
|        | 67577612-79667232   | 12.09        | cn1              |                  |              |             |
|        | 79914436-80668827   | 0.754        | cn1              |                  |              |             |
|        | 80785260-83189802   | 2.405        | cn1              |                  |              |             |
|        | 83639308-85073366   | 1.434        | cn1              |                  |              |             |
|        | 85542839-127750541  | 42.208       | cn1              |                  |              |             |
|        | 128108037-134439182 | 6.331        | cn1              |                  |              |             |
| TP21   | 24750900-47461018   | 22.71        | cn1              |                  |              |             |
|        | 73508680-83480119   | 9.971        | cn1              |                  |              |             |
|        | 83524141-116992039  | 33.468       | cn1              |                  |              |             |
|        | 117492601-119996648 | 2.504        | cn1              |                  |              |             |
|        | 120493810-122186945 | 1.693        | cn1              |                  |              |             |
|        | 123252803-123608170 | 0.355        | cn1              |                  |              |             |
|        | 124529138-125115632 | 0.586        | cn1              |                  |              |             |
|        | 125855565-126161131 | 0.306        | cn1              |                  |              |             |
|        | 127525578-128328976 | 0.803        | cn1              |                  |              |             |
|        | 129218021-130038014 | 0.82         | cn1              |                  |              |             |
| TP22   | 107419503-108193907 | 0.774        | cn1              |                  |              |             |
| TP28   | 87166652-129162426  | 41.996       | cn1              |                  |              |             |
| TP34   |                     |              |                  | 4683016-15036492 | 10.353       | cn3         |
|        | 15072394-17766300   | 2.694        | cn1              |                  |              |             |
|        | 18027232-18156255   | 0.129        | cn1              |                  |              |             |
|        | 18689422-23716937   | 5.028        | cn1              |                  |              |             |
|        | 24032403-43028261   | 18.996       | cn1              |                  |              |             |
|        | 43096817-49992129   | 6.895        | cn1              |                  |              |             |
|        | 85733549-86472504   | 0.739        | cn1              |                  |              |             |
|        | 96906119-99794679   | 2.889        | cn1              |                  |              |             |

|                     |                     |        |     |                     |       |     |
|---------------------|---------------------|--------|-----|---------------------|-------|-----|
|                     | 99957205-134439182  | 34.482 | cn1 |                     |       |     |
| TP35                |                     |        |     | 18907033-18918255   | 0.011 | cn4 |
| TP37                | 107346114-107685623 | 0.34   | cn1 |                     |       |     |
|                     | 127550030-128131996 | 0.582  | cn1 |                     |       |     |
| TP4                 | 85042204-85600090   | 0.558  | cn1 |                     |       |     |
|                     | 107346114-108015771 | 0.67   | cn1 |                     |       |     |
|                     | 110891599-111596604 | 0.705  | cn1 |                     |       |     |
| TP57                | 64171622-134439182  | 70.268 | cn1 |                     |       |     |
| TP651               |                     |        |     | 201447-1282405      | 1.081 | cn3 |
|                     | 107401046-107685623 | 0.285  | cn1 | 133971866-134439182 | 0.467 | cn3 |
| TP799               | 14911180-15302149   | 0.391  | cn1 |                     |       |     |
|                     | 16135202-16838625   | 0.703  | cn1 |                     |       |     |
|                     | 23286060-24116855   | 0.831  | cn1 |                     |       |     |
|                     | 24129346-26517526   | 2.388  | cn1 |                     |       |     |
|                     | 26682306-28827116   | 2.145  | cn1 |                     |       |     |
|                     | 28864122-50437347   | 21.573 | cn1 |                     |       |     |
|                     | 58519323-61099233   | 2.58   | cn1 |                     |       |     |
|                     | 84869209-88333920   | 3.465  | cn1 |                     |       |     |
|                     | 90686353-91023308   | 0.337  | cn1 |                     |       |     |
|                     | 92103764-92218633   | 0.115  | cn1 |                     |       |     |
|                     | 92780634-93373126   | 0.592  | cn1 |                     |       |     |
|                     | 100045570-103051410 | 3.006  | cn1 |                     |       |     |
|                     | 107511257-108661992 | 1.151  | cn1 |                     |       |     |
| 127437820-128227400 | 0.79                | cn1    |     |                     |       |     |

### Deletions and amplifications chromosome 12

| Sample | Deletions         |              |                  | Amplifications   |              |             |
|--------|-------------------|--------------|------------------|------------------|--------------|-------------|
|        | Start - End       | length (Mbp) | copy number (cn) | Start - End      | length (Mbp) | copy number |
| TP166  |                   |              |                  | 9096297-10805364 | 1.709        | cn3         |
|        | 11492448-24692042 | 13.199595    | cn1              |                  |              |             |
| TP170  | 50446-2045912     | 1.995466     | cn1              |                  |              |             |
|        | 5572706-6768721   | 1.196015     | cn1              |                  |              |             |
|        | 10186468-16521376 | 6.334908     | cn1              |                  |              |             |
|        | 25623168-27128352 | 1.505184     | cn1              |                  |              |             |
|        | 30706795-34650850 | 3.944055     | cn1              |                  |              |             |
| TP28   | 50446-24681370    | 24.630924    | cn1              |                  |              |             |
| TP34   |                   |              |                  | 50446-2539893    | 2.489        | cn3         |
|        | 10595958-11113635 | 0.517677     | cn1              |                  |              |             |
|        | 11679256-18534382 | 6.855126     | cn1              |                  |              |             |
|        | 18943447-19545019 | 0.601572     | cn1              |                  |              |             |

|       |                   |           |     |                    |         |     |
|-------|-------------------|-----------|-----|--------------------|---------|-----|
|       | 28541832-29940348 | 1.398516  | cn1 |                    |         |     |
| TP37  | 14746099-17565954 | 2.819855  | cn1 |                    |         |     |
|       | 25873708-26586394 | 0.712686  | cn1 |                    |         |     |
| TP41  |                   |           |     | 50446-28043915     | 27.993  | cn4 |
|       |                   |           |     | 28101865-132387995 | 104.286 | cn4 |
| TP56  |                   |           |     | 31247316-31302088  | 0.055   | cn4 |
| TP799 | 5651643-42451697  | 36.800054 | cn1 |                    |         |     |

### Deletions and amplifications chromosome 13

| Sample | Deletions           |              |                  | Amplifications      |              |             |
|--------|---------------------|--------------|------------------|---------------------|--------------|-------------|
|        | Start - End         | length (Mbp) | copy number (cn) | Start - End         | length (Mbp) | copy number |
| TP166  | 17960319-26010888   | 8.05057      | cn1              |                     |              |             |
|        | 36042848-37758104   | 1.715257     | cn1              |                     |              |             |
|        | 81039542-84737228   | 3.697687     | cn1              |                     |              |             |
| TP168  | 34423949-80551061   | 46.127112    | cn1              | 17960319-21595908   | 3.635589     | cn3         |
|        |                     |              |                  | 21615490-28790143   | 7.174653     | cn3         |
|        |                     |              |                  | 28813749-29435297   | 0.621548     | cn3         |
|        |                     |              |                  | 29450901-34405811   | 4.95491      | cn3         |
|        |                     |              |                  | 80607647-85267121   | 4.659474     | cn3         |
|        |                     |              |                  | 85302744-108185086  | 22.882342    | cn3         |
|        |                     |              |                  | 108209270-114092980 | 5.88371      | cn3         |
| TP21   | 17960319-114092980  | 96.132661    | cn1              |                     |              |             |
| TP22   | 69642526-69670395   | 0.027869     | cn1              |                     |              |             |
| TP34   | 17960319-28105352   | 10.145033    | cn1              |                     |              |             |
|        | 35112563-114092980  | 78.980417    | cn1              |                     |              |             |
| TP37   | 40332062-41649707   | 1.317645     | cn1              |                     |              |             |
|        | 47414758-50392988   | 2.97823      | cn1              |                     |              |             |
| TP41   |                     |              |                  | 17960319-18515769   | 0.55545      | cn3         |
|        |                     |              |                  | 113800334-114092980 | 0.292646     | cn4         |
| TP56   | 48879065-114092980  | 65.213915    | cn1              |                     |              |             |
| TP651  |                     |              |                  | 112309830-114092980 | 1.78315      | cn3         |
| TP799  | 17960319-20860207   | 2.899888     | cn1              |                     |              |             |
|        | 20907299-22673454   | 1.766155     | cn1              |                     |              |             |
|        | 35206757-58049515   | 22.842758    | cn1              |                     |              |             |
|        | 58076259-98190229   | 40.11397     | cn1              |                     |              |             |
|        | 98735083-105440688  | 6.705605     | cn1              |                     |              |             |
|        | 106032071-106340043 | 0.307972     | cn1              |                     |              |             |
|        | 107190506-114092980 | 6.902474     | cn1              |                     |              |             |

Deletions and amplifications chromosome 14

| Sample | Deletions         |              |                     | Amplifications     |              |             |
|--------|-------------------|--------------|---------------------|--------------------|--------------|-------------|
|        | Start - End       | length (Mbp) | copy number (cn)    | Start - End        | length (Mbp) | copy number |
| TP166  | 19336854-20599898 | 1.263045     | cn1                 |                    |              |             |
|        | 21284915-21960251 | 0.675337     | cn1                 |                    |              |             |
|        |                   |              |                     | 22008051-22893753  | 0.885703     | cn3         |
|        |                   |              |                     | 47937414-48554359  | 0.616946     | cn3         |
|        |                   |              |                     | 48639394-49951704  | 1.312311     | cn3         |
|        |                   |              |                     | 71714279-73735385  | 2.021107     | cn3         |
|        |                   |              |                     | 84713393-85265055  | 0.551663     | cn3         |
|        |                   |              |                     | 85288372-87547166  | 2.258795     | cn3         |
|        |                   |              |                     | 87586597-97787248  | 10.200652    | cn3         |
|        |                   |              | 97813853-98038354   | 0.224502           | cn3          |             |
|        |                   |              | 98043671-106356482  | 8.312812           | cn3          |             |
| TP168  | 19336854-19502884 | 0.16603      | cn1                 |                    |              |             |
| TP170  | 19336854-19489991 | 0.153137     | cn1                 |                    |              |             |
|        | 21337331-21455611 | 0.11828      | cn1                 |                    |              |             |
|        | 21459943-22069902 | 0.609959     | cn0                 |                    |              |             |
|        |                   |              |                     | 97697068-97745151  | 0.048083     | cn3         |
|        |                   |              |                     | 97755176-105042939 | 7.287763     | cn3         |
|        |                   |              | 105169265-105238706 | 0.069441           | cn3          |             |
|        |                   |              | 105344295-106295344 | 0.951049           | cn3          |             |
|        |                   |              | 106334195-106356482 | 0.022287           | cn3          |             |
| TP172  | 21307961-21634087 | 0.326126     | cn1                 |                    |              |             |
|        | 21640747-21651118 | 0.010371     | cn0                 |                    |              |             |
|        | 21661661-21704535 | 0.042874     | cn1                 |                    |              |             |
|        | 21705195-22040167 | 0.334972     | cn0                 |                    |              |             |
| TP21   | 21407981-21768821 | 0.36084      | cn1                 |                    |              |             |
|        | 21784072-22029666 | 0.245594     | cn0                 |                    |              |             |
|        | 22038694-22045568 | 0.006874     | cn1                 |                    |              |             |
|        |                   |              | 70840238-72356586   | 1.516348           | cn3          |             |
|        |                   |              | 74166687-106356482  | 32.189795          | cn3          |             |
| TP22   |                   |              |                     | 19336854-19489991  | 0.153137     | cn3         |
|        | 21259099-21807891 | 0.548792     | cn1                 |                    |              |             |
|        | 21817323-22044096 | 0.226773     | cn0                 |                    |              |             |
|        | 95130522-95211348 | 0.080826     | cn1                 |                    |              |             |
| TP25   | 21480460-21844535 | 0.364075     | cn1                 |                    |              |             |
|        | 21860760-22008401 | 0.147641     | cn0                 |                    |              |             |
| TP28   |                   |              |                     |                    |              |             |
|        | 21197463-22008401 | 0.810938     | cn1                 |                    |              |             |
|        |                   |              |                     | 22099514-47749589  | 25.650075    | cn3         |

|       |                                                             |                                  |                   |                                                                                                           |                                                           |                                 |
|-------|-------------------------------------------------------------|----------------------------------|-------------------|-----------------------------------------------------------------------------------------------------------|-----------------------------------------------------------|---------------------------------|
|       | 47760979-47959934<br>95066311-95136468                      | 0.198955<br>0.070157             | cn1<br>cn1        |                                                                                                           |                                                           |                                 |
| TP34  | 21545831-21697994<br>21703508-22029666<br>22038694-22045568 | 0.152163<br>0.326158<br>0.006874 | cn1<br>cn0<br>cn1 | 95141458-106356482<br>19336854-19489991<br>95282468-98681324<br>98741541-106295344<br>106334195-106356482 | 11.215024<br>0.153137<br>3.398856<br>7.553803<br>0.022287 | cn3<br>cn3<br>cn3<br>cn3<br>cn4 |
| TP35  | 19336854-19489991<br>21394980-21603727<br>21632122-22045568 | 0.153137<br>0.208747<br>0.413446 | cn1<br>cn0<br>cn1 |                                                                                                           |                                                           |                                 |
| TP37  | 20918741-21394980<br>21396700-22045568<br>22069902-22239552 | 0.476239<br>0.648868<br>0.16965  | cn1<br>cn0<br>cn1 |                                                                                                           |                                                           |                                 |
| TP41  | 21603727-22045568                                           | 0.441841                         | cn1               | 19336854-21557538<br>22069902-26645554<br>26859879-95241049<br>95247926-99589374<br>99633696-106356482    | 2.220684<br>4.575652<br>68.38117<br>4.341448<br>6.722786  | cn5<br>cn4<br>cn4<br>cn5<br>cn4 |
| TP43  | 21394980-22045568                                           | 0.650588                         | cn0               |                                                                                                           |                                                           |                                 |
| TP4   | 21860760-22008401                                           | 0.147641                         | cn0               | 19336854-21844535<br>95320653-106356482                                                                   | 2.507681<br>11.035829                                     | cn4<br>cn4                      |
| TP56  | 19336854-22045568<br>105829129-106356482                    | 2.708714<br>0.527353             | cn1<br>cn1        | 95233471-105786534                                                                                        | 10.553063                                                 | cn3                             |
| TP57  | 21407981-21844535<br>21860760-22008401<br>22029666-22069902 | 0.436554<br>0.147641<br>0.040236 | cn1<br>cn0<br>cn1 | 19336854-19489991<br>105786534-106043812                                                                  | 0.153137<br>0.257278                                      | cn4<br>cn4                      |
| TP651 | 19336854-19489991<br>21545831-21697994<br>21703508-22029666 | 0.153137<br>0.152163<br>0.326158 | cn1<br>cn1<br>cn0 |                                                                                                           |                                                           |                                 |
| TP799 | 21842435-22069902<br>26605274-45120624<br>45537691-46539612 | 0.227467<br>18.51535<br>1.001921 | cn1<br>cn1<br>cn1 | 19336854-21821935<br>95416603-106356482                                                                   | 2.485081<br>10.939879                                     | cn3<br>cn3                      |



Deletions and amplifications chromosome 15

| Sample | Deletions          |              |                  | Amplifications     |              |             |
|--------|--------------------|--------------|------------------|--------------------|--------------|-------------|
|        | Start - End        | length (Mbp) | copy number (cn) | Start - End        | length (Mbp) | copy number |
| TP166  |                    |              |                  | 18427103-20089383  | 1.662281     | cn3         |
| TP168  | 18427103-20089383  | 1.66228      | cn1              |                    |              |             |
| TP170  |                    |              |                  | 18711364-20005562  | 1.294198     | cn3         |
| TP21   | 18427103-20089383  | 1.66228      | cn1              |                    |              |             |
| TP25   | 91954544-92037412  | 0.082868     | cn1              |                    |              |             |
| TP28   |                    |              |                  | 21908260-22076598  | 0.168338     | cn3         |
| TP35   | 18427103-20089383  | 1.66228      | cn1              |                    |              |             |
| TP37   |                    |              |                  | 18711364-19407629  | 0.696265     | cn3         |
|        |                    |              |                  | 19821421-20089383  | 0.267962     | cn3         |
| TP41   |                    |              |                  | 18427103-19407629  | 0.980526     | cn3         |
|        |                    |              |                  | 19821421-100192115 | 80.370694    | cn4         |
| TP43   | 18427103-20089383  | 1.66228      | cn1              |                    |              |             |
| TP4    | 18427103-19407629  | 0.980526     | cn1              |                    |              |             |
| TP57   | 18427103-19407629  | 0.980526     | cn1              |                    |              |             |
|        |                    |              |                  | 89934598-100192115 | 10.257517    | cn4         |
| TP651  | 18427103-19407629  | 0.980526     | cn1              |                    |              |             |
| TP799  | 18711364-19407629  | 0.696265     | cn1              |                    |              |             |
|        | 93754271-94130560  | 0.376289     | cn1              |                    |              |             |
|        | 94699268-97327267  | 2.627999     | cn1              |                    |              |             |
|        | 97471323-100192115 | 2.720792     | cn1              |                    |              |             |

Deletions and amplifications chromosome 16

| Sample | Deletions         |              |                  | Amplifications    |              |             |
|--------|-------------------|--------------|------------------|-------------------|--------------|-------------|
|        | Start - End       | length (Mbp) | copy number (cn) | Start - End       | length (Mbp) | copy number |
| TP22   | 31010-2251161     | 2.220151     | cn1              |                   |              |             |
| TP34   | 94345-1693333     | 1.598988     | cn1              | 45956961-47166656 | 1.209695     | cn3         |
|        |                   |              |                  | 48850399-49134613 | 0.284214     | cn3         |
|        |                   |              |                  |                   |              |             |
|        | 49181590-51336198 | 2.154608     | cn1              | 53717086-54058455 | 0.341369     | cn3         |
|        |                   |              |                  | 54086912-55628876 | 1.541964     | cn4         |
|        |                   |              |                  | 55663340-55908904 | 0.245564     | cn3         |
|        |                   |              |                  | 55980020-56631711 | 0.651691     | cn4         |
|        |                   |              |                  | 56657709-56764704 | 0.106995     | cn3         |
|        |                   |              |                  |                   |              |             |
|        |                   |              |                  |                   |              |             |

|       |                                        |                      |            |                                                                             |                                               |                          |
|-------|----------------------------------------|----------------------|------------|-----------------------------------------------------------------------------|-----------------------------------------------|--------------------------|
|       | 58812289-62127751<br>63483786-65297573 | 3.315462<br>1.813787 | cn1<br>cn1 |                                                                             |                                               |                          |
|       | 72424503-72522439<br>75079920-75217831 | 0.097936<br>0.137911 | cn1<br>cn1 | 68292004-69753654<br>69765380-70390833                                      | 1.46165<br>0.625453                           | cn3<br>cn4               |
|       | 76994109-77065566<br>78017699-80883296 | 0.071457<br>2.865597 | cn1<br>cn1 | 76662867-76675377                                                           | 0.01251                                       | cn3                      |
|       | 82021922-82682771                      | 0.660849             | cn1        | 81389048-82008540                                                           | 0.619492                                      | cn3                      |
|       |                                        |                      |            | 82723121-83882068                                                           | 1.158947                                      | cn3                      |
| TP35  |                                        |                      |            |                                                                             |                                               |                          |
| TP37  | 55043296-55404305                      | 0.361009             | cn1        | 14993255-16638105                                                           | 1.64485                                       | cn3                      |
| TP41  |                                        |                      |            | 31010-7265579<br>7282778-34307201<br>34344361-34560001<br>34649292-88690776 | 7.234569<br>27.024423<br>0.21564<br>54.041484 | cn4<br>cn4<br>cn4<br>cn4 |
| TP56  |                                        |                      |            | 28398018-30227808                                                           | 1.82979                                       | cn3                      |
| TP799 | 86246025-88690776                      | 2.444751             | cn1        |                                                                             |                                               |                          |

### Deletions and amplifications chromosome 17

| Sample | Deletions                                                |                                    |                   | Amplifications    |              |             |
|--------|----------------------------------------------------------|------------------------------------|-------------------|-------------------|--------------|-------------|
|        | Start - End                                              | length (Mbp)                       | copy number (cn)  | Start - End       | length (Mbp) | copy number |
| TP166  | 16200923-17564918<br>20549240-22029237                   | 1.363996<br>1.479998               | cn1<br>cn1        | 17723129-20463036 | 2.739908     | cn3         |
| TP170  | 18901-7490406                                            | 7.471505                           | cn1               | 78369332-78599918 | 0.230586     | cn3         |
| TP21   | 18901-16486774<br>31473221-31501499                      | 16.467873<br>0.028278              | cn1<br>cn1        |                   |              |             |
| TP22   | 18901-22691152<br>47089473-49687051<br>66119992-78599918 | 22.672251<br>2.597578<br>12.479926 | cn1<br>cn1<br>cn1 | 41532916-41707706 | 0.17479      | cn3         |
| TP28   | 31473221-31501499                                        | 0.028278                           | cn1               |                   |              |             |
| TP34   | 18901-19535432<br>20549240-21491135<br>70909466-78599918 | 19.516531<br>0.941895<br>7.690452  | cn1<br>cn1<br>cn1 | 54758734-54921099 | 0.162365     | cn3         |

|       |                                        |                       |            |                                        |                      |            |
|-------|----------------------------------------|-----------------------|------------|----------------------------------------|----------------------|------------|
| TP35  | 73729578-78599918                      | 4.87034               | cn1        |                                        |                      |            |
| TP37  | 18901-22029237                         | 22.010336             | cn1        | 41011471-41012856<br>41521621-41719833 | 0.001385<br>0.198212 | cn5<br>cn5 |
| TP41  |                                        |                       |            | 21449435-68346547                      | 46.897112            | cn4        |
| TP4   | 18901-5841540<br>73545682-78599918     | 5.822639<br>5.054236  | cn1<br>cn1 | 27535387-73524449                      | 45.989062            | cn3        |
| TP56  |                                        |                       |            | 41011471-41012856<br>41521621-41719833 | 0.001385<br>0.198212 | cn4<br>cn4 |
| TP57  | 18901-883601                           | 0.8647                | cn1        |                                        |                      |            |
| TP651 |                                        |                       |            | 13119162-13185172<br>78251628-78599918 | 0.06601<br>0.34829   | cn3<br>cn3 |
| TP799 | 66303786-68152257<br>68429991-78599918 | 1.848471<br>10.169927 | cn1<br>cn1 | 41011471-41012856<br>41521621-41719833 | 0.001385<br>0.198212 | cn4<br>cn4 |

#### Deletions and amplifications chromosome 18

| Sample | Deletions                                                                     |                                             |                          | Amplifications                     |                      |             |
|--------|-------------------------------------------------------------------------------|---------------------------------------------|--------------------------|------------------------------------|----------------------|-------------|
|        | Start - End                                                                   | length (Mbp)                                | copy number (cn)         | Start - End                        | length (Mbp)         | copy number |
| TP170  | 210071-15096727                                                               | 14.886656                                   | cn1                      |                                    |                      |             |
| TP172  | 210071-5687093<br>61268473-65054316<br>65118986-74193569<br>74258734-76115554 | 5.477022<br>3.785843<br>9.074583<br>1.85682 | cn1<br>cn1<br>cn1<br>cn1 |                                    |                      |             |
| TP37   | 30600147-31481579                                                             | 0.881432                                    | cn1                      |                                    |                      |             |
| TP41   |                                                                               |                                             |                          | 210071-76115554                    | 75.905483            | cn4         |
| TP56   | 56299500-56468909                                                             | 0.169409                                    | cn1                      |                                    |                      |             |
| TP651  |                                                                               |                                             |                          | 210071-804990<br>75565158-76115554 | 0.594919<br>0.550396 | cn3<br>cn3  |

#### Deletions and amplifications chromosome 19

| Sample | Deletions                                                                     |                                        |                          | Amplifications |              |             |
|--------|-------------------------------------------------------------------------------|----------------------------------------|--------------------------|----------------|--------------|-------------|
|        | Start - End                                                                   | length (Mbp)                           | copy number              | Start - End    | length (Mbp) | copy number |
| TP170  | 7092871-7541871<br>9869241-11695721<br>13544881-14465154<br>54080466-55184866 | 0.449<br>1.82648<br>0.920273<br>1.1044 | cn1<br>cn1<br>cn1<br>cn1 |                |              |             |

|       |                   |          |     |                                                          |                                  |                   |
|-------|-------------------|----------|-----|----------------------------------------------------------|----------------------------------|-------------------|
|       | 58715491-59259065 | 0.543574 | cn1 |                                                          |                                  |                   |
| TP34  |                   |          |     | 212033-7442221<br>10231490-10698677<br>13615667-15607804 | 7.230188<br>0.467187<br>1.992137 | cn3<br>cn3<br>cn3 |
|       | 21590361-22799189 | 1.208828 | cn1 |                                                          |                                  |                   |
| TP41  |                   |          |     | 212033-63731511                                          | 63.519478                        | cn4               |
| TP56  | 48024719-48427094 | 0.402375 | cn1 |                                                          |                                  |                   |
| TP651 |                   |          |     | 48746898-62981821<br>63050356-63731511                   | 14.234923<br>0.681155            | cn3<br>cn4        |

### Deletions and amplifications chromosome 20

| Sample | Deletions                                                                                    |                                                          |                                      | Amplifications                                                                                                                  |                                                                                   |                                                    |
|--------|----------------------------------------------------------------------------------------------|----------------------------------------------------------|--------------------------------------|---------------------------------------------------------------------------------------------------------------------------------|-----------------------------------------------------------------------------------|----------------------------------------------------|
|        | Start - End                                                                                  | length (Mbp)                                             | copy number (cn)                     | Start - End                                                                                                                     | length (Mbp)                                                                      | copy number                                        |
| TP166  | 17408-23216064<br>24532838-25623602<br>34210240-36111830                                     | 23.198657<br>1.090765<br>1.901591                        | cn1<br>cn1<br>cn1                    |                                                                                                                                 |                                                                                   |                                                    |
| TP170  |                                                                                              |                                                          |                                      | 41499-169942<br>178177-754878<br>780763-2462130<br>2475510-4133944<br>4158282-5251028<br>5274527-5728520<br>5766470-15750809    | 0.128443<br>0.576701<br>1.681367<br>1.658434<br>1.092746<br>0.453993<br>9.984339  | cn3<br>cn3<br>cn3<br>cn3<br>cn3<br>cn3<br>cn3      |
| TP25   | 17408-14974075<br>14985065-15034862<br>15049464-45780658                                     | 14.956667<br>0.049797<br>30.731194                       | cn1<br>cn0<br>cn1                    |                                                                                                                                 |                                                                                   |                                                    |
| TP34   |                                                                                              |                                                          |                                      | 13462603-13793726                                                                                                               | 0.331123                                                                          | cn3                                                |
| TP35   | 34615059-35098973                                                                            | 0.483914                                                 | cn1                                  |                                                                                                                                 |                                                                                   |                                                    |
| TP41   |                                                                                              |                                                          |                                      | 17408-62376958                                                                                                                  | 62.35955                                                                          | cn4                                                |
| TP56   | 17408-28119554<br>30839943-53398687                                                          | 28.102146<br>22.558744                                   | cn1<br>cn1                           |                                                                                                                                 |                                                                                   |                                                    |
| TP651  | 10424071-11471083<br><br>14163601-15419215<br><br>29695950-30298646<br><br>35586774-43375783 | 1.047012<br><br>1.255614<br><br>0.602696<br><br>7.789009 | cn1<br><br>cn1<br><br>cn1<br><br>cn1 | 17408-567392<br>574164-10420593<br><br>11483503-13886789<br>13935668-14137779<br><br>15438760-29565478<br><br>30356095-35515209 | 0.549984<br>9.846429<br><br>2.403286<br>0.202111<br><br>14.126718<br><br>5.159114 | cn4<br>cn3<br><br>cn3<br>cn3<br><br>cn3<br><br>cn3 |

|       |                   |           |     |                   |          |     |
|-------|-------------------|-----------|-----|-------------------|----------|-----|
|       |                   |           |     | 43402020-43602518 | 0.200498 | cn4 |
|       |                   |           |     | 43605486-45033687 | 1.428201 | cn3 |
|       | 45044330-54307144 | 9.262814  | cn1 |                   |          |     |
|       | 56633949-59361400 | 2.727451  | cn1 | 54337486-56601858 | 2.264372 | cn3 |
|       | 61994544-62376958 | 0.382414  | cn1 | 59391304-61879921 | 2.488617 | cn3 |
| TP799 | 41499-5809506     | 5.768007  | cn1 |                   |          |     |
|       | 5835175-8482355   | 2.64718   | cn1 |                   |          |     |
|       | 29309964-48950402 | 19.640438 | cn1 |                   |          |     |

### Deletions and amplifications chromosome 21

| Sample | Deletions        |              |                  | Amplifications    |              |             |
|--------|------------------|--------------|------------------|-------------------|--------------|-------------|
|        | Start - End      | length (Mbp) | copy number (cn) | Start - End       | length (Mbp) | copy number |
| TP170  | 9887804-9984282  | 0.096478     | cn1              |                   |              |             |
| TP172  | 9887804-9984282  | 0.096478     | cn1              |                   |              |             |
| TP35   | 9887804-9984282  | 0.096478     | cn1              |                   |              |             |
| TP37   | 9887804-23765015 | 13.877211    | cn1              |                   |              |             |
| TP41   |                  |              |                  | 9887804-46894358  | 37.006554    | cn4         |
| TP57   |                  |              |                  | 35567720-37121518 | 1.553798     | cn5         |
|        |                  |              |                  | 37209275-49465770 | 12.256495    | cn4         |
| TP651  | 9887804-9984282  | 0.096478     | cn1              |                   |              |             |

### Deletions and amplifications chromosome 22

| Sample | Deletions         |              |                  | Amplifications    |              |             |
|--------|-------------------|--------------|------------------|-------------------|--------------|-------------|
|        | Start - End       | length (Mbp) | copy number (cn) | Start - End       | length (Mbp) | copy number |
| TP166  |                   |              |                  | 15430576-19786161 | 4.355586     | cn3         |
|        |                   |              |                  | 22730046-26706391 | 3.976346     | cn3         |
|        |                   |              |                  | 28193409-35763151 | 7.569743     | cn3         |
|        |                   |              |                  | 35840515-39200734 | 3.36022      | cn4         |
|        |                   |              |                  | 39372056-40665008 | 1.292953     | cn3         |
|        |                   |              |                  | 40710467-48247603 | 7.537137     | cn3         |
|        |                   |              |                  | 48279352-49465770 | 1.186419     | cn3         |
| TP168  |                   |              |                  | 14441016-26638884 | 12.197868    | cn3         |
|        |                   |              |                  | 26695126-31588112 | 4.892986     | cn3         |
|        |                   |              |                  | 31615583-49465770 | 17.850187    | cn3         |
| TP170  | 14441016-31939760 | 17.498744    | cn1              |                   |              |             |
|        |                   |              |                  | 31977306-49465770 | 17.488464    | cn3         |
| TP21   | 15539032-29797058 | 14.258026    | cn1              |                   |              |             |

|       |                                                             |                                   |                   |                                                             |                                   |                   |
|-------|-------------------------------------------------------------|-----------------------------------|-------------------|-------------------------------------------------------------|-----------------------------------|-------------------|
| TP25  | 14441016-35169353<br>49280813-49465770                      | 20.728337<br>0.184957             | cn1<br>cn1        |                                                             |                                   |                   |
| TP28  | 14441016-33406963                                           | 18.965947                         | cn1               |                                                             |                                   |                   |
| TP34  | 14441016-15945909<br>15962234-16119107<br>16142775-33053140 | 1.504893<br>0.156873<br>16.910365 | cn1<br>cn0<br>cn1 |                                                             |                                   |                   |
| TP35  |                                                             |                                   |                   | 21936578-22254406                                           | 0.317828                          | cn3               |
| TP41  |                                                             |                                   |                   | 14441016-15613460<br>17696975-19515310<br>30428755-49465770 | 1.172444<br>1.818335<br>19.037015 | cn3<br>cn3<br>cn3 |
| TP43  |                                                             |                                   |                   | 24043842-24235625                                           | 0.191783                          | cn3               |
| TP651 | 21482039-29584212                                           | 8.102173                          | cn1               | 14441016-21389135<br>29653610-48222816<br>48232861-49465770 | 6.948119<br>18.569206<br>1.232909 | cn3<br>cn3<br>cn3 |
| TP799 | 22180211-33255348                                           | 11.075137                         | cn1               | 17269781-17378492                                           | 0.108711                          | cn3               |
